# Supplementary material for: Long-term erosion rates as a function of climate derived from the impact crater inventory
Source: Copernicus journal article supplement (doi:10.5194/esurf-7-459-2019), 2019-05-23
Supplement: Supplementary file 1 [file esurf-7-459-2019-supplement.zip]

## Data Supplement

The following tables contain the area, relief, and numbers of craters for all considered climatic/geologic provinces.

### Polar tundra (ET)

#### Shields:

|                      |         |        |       |       |
|----------------------|---------|--------|-------|-------|
| $A_i[\text{km}^2]$   | 1238869 | 196957 | 24331 | 20581 |
| $\Delta_i[\text{m}]$ | 224     | 478    | 582   | 815   |
| $n_i$                | 2       | 0      | 1     | 0     |

$$A = \sum_i A_i = 1480737 \text{ km}^2, \Delta = \frac{\sum_i A_i \Delta_i}{\sum_i A_i} = 272 \text{ m}, \sum_i \frac{A_i}{\Delta_i} = 6005 \frac{\text{km}^2}{\text{m}}, n = \sum_i n_i = 3$$

#### Platforms:

|                      |        |        |       |       |       |       |
|----------------------|--------|--------|-------|-------|-------|-------|
| $A_i[\text{km}^2]$   | 505944 | 374548 | 48061 | 40622 | 28363 | 13015 |
| $\Delta_i[\text{m}]$ | 72     | 122    | 77    | 126   | 36    | 249   |
| $n_i$                | 0      | 1      | 0     | 0     | 0     | 0     |

$$A = \sum_i A_i = 1010553 \text{ km}^2, \Delta = \frac{\sum_i A_i \Delta_i}{\sum_i A_i} = 94 \text{ m}, \sum_i \frac{A_i}{\Delta_i} = 11873 \frac{\text{km}^2}{\text{m}}, n = \sum_i n_i = 1$$

## Orogens:

|                      |        |        |        |        |        |       |
|----------------------|--------|--------|--------|--------|--------|-------|
| $A_i[\text{km}^2]$   | 865292 | 178668 | 123976 | 111396 | 102642 | 32729 |
| $\Delta_i[\text{m}]$ | 534    | 172    | 623    | 204    | 321    | 1050  |
| $n_i$                | 0      | 1      | 0      | 0      | 0      | 0     |

$$A = \sum_i A_i = 1414703 \text{ km}^2, \Delta = \frac{\sum_i A_i \Delta_i}{\sum_i A_i} = 467 \text{ m}, \sum_i \frac{A_i}{\Delta_i} = 3754 \frac{\text{km}^2}{\text{m}}, n = \sum_i n_i = 1$$

## Basins:

|                      |       |       |
|----------------------|-------|-------|
| $A_i[\text{km}^2]$   | 34049 | 18459 |
| $\Delta_i[\text{m}]$ | 189   | 706   |
| $n_i$                | 0     | 0     |

$$A = \sum_i A_i = 52507 \text{ km}^2, \Delta = \frac{\sum_i A_i \Delta_i}{\sum_i A_i} = 371 \text{ m}, \sum_i \frac{A_i}{\Delta_i} = 207 \frac{\text{km}^2}{\text{m}}, n = \sum_i n_i = 0$$

## Igneous provinces:

|                      |       |      |      |
|----------------------|-------|------|------|
| $A_i[\text{km}^2]$   | 42292 | 9663 | 6455 |
| $\Delta_i[\text{m}]$ | 522   | 845  | 965  |
| $n_i$                | 0     | 0    | 0    |

$$A = \sum_i A_i = 58410 \text{ km}^2, \Delta = \frac{\sum_i A_i \Delta_i}{\sum_i A_i} = 624 \text{ m}, \sum_i \frac{A_i}{\Delta_i} = 99 \frac{\text{km}^2}{\text{m}}, n = \sum_i n_i = 0$$

### Extended crust:

|                      |        |       |       |       |
|----------------------|--------|-------|-------|-------|
| $A_i[\text{km}^2]$   | 698124 | 89495 | 68747 | 18385 |
| $\Delta_i[\text{m}]$ | 447    | 104   | 617   | 408   |
| $n_i$                | 1      | 0     | 0     | 0     |

$$A = \sum_i A_i = 874750 \text{ km}^2, \Delta = \frac{\sum_i A_i \Delta_i}{\sum_i A_i} = 424 \text{ m}, \sum_i \frac{A_i}{\Delta_i} = 2582 \frac{\text{km}^2}{\text{m}}, n = \sum_i n_i = 1$$

### All (13) erosive provinces (shields, orogens, igneous):

$$A = \sum_i A_i = 2953850 \text{ km}^2, \Delta = \frac{\sum_i A_i \Delta_i}{\sum_i A_i} = 372 \text{ m}, \sum_i \frac{A_i}{\Delta_i} = 9859 \frac{\text{km}^2}{\text{m}}, n = \sum_i n_i = 4$$

## Cold (D)

### Shields:

|                      |         |         |        |        |        |       |       |       |
|----------------------|---------|---------|--------|--------|--------|-------|-------|-------|
| $A_i[\text{km}^2]$   | 3886514 | 1148574 | 861186 | 255828 | 176801 | 99242 | 89439 | 65794 |
| $\Delta_i[\text{m}]$ | 93      | 140     | 533    | 61     | 370    | 62    | 207   | 671   |
| $n_i$                | 13      | 13      | 1      | 0      | 0      | 2     | 0     | 0     |

$$A = \sum_i A_i = 6583380 \text{ km}^2, \Delta = \frac{\sum_i A_i \Delta_i}{\sum_i A_i} = 172 \text{ m}, \sum_i \frac{A_i}{\Delta_i} = 58207 \frac{\text{km}^2}{\text{m}}, n = \sum_i n_i = 29$$

## Platforms:

|                      |         |         |         |         |        |       |       |       |
|----------------------|---------|---------|---------|---------|--------|-------|-------|-------|
| $A_i[\text{km}^2]$   | 5177117 | 2988298 | 1928258 | 1400482 | 387686 | 59755 | 43797 | 11672 |
| $\Delta_i[\text{m}]$ | 114     | 66      | 70      | 274     | 25     | 59    | 273   | 331   |
| $n_i$                | 2       | 2       | 3       | 1       | 0      | 0     | 0     | 0     |

$$A = \sum_i A_i = 11997064 \text{ km}^2, \Delta = \frac{\sum_i A_i \Delta_i}{\sum_i A_i} = 111 \text{ m}, \sum_i \frac{A_i}{\Delta_i} = 140000 \frac{\text{km}^2}{\text{m}}, n = \sum_i n_i = 8$$

## Orogens:

|                      |          |        |        |        |        |
|----------------------|----------|--------|--------|--------|--------|
| $A_i[\text{km}^2]$   | 10863532 | 646975 | 438864 | 232560 | 102053 |
| $\Delta_i[\text{m}]$ | 582      | 170    | 214    | 613    | 216    |
| $n_i$                | 2        | 0      | 0      | 2      | 0      |

$$A = \sum_i A_i = 12283985 \text{ km}^2, \Delta = \frac{\sum_i A_i \Delta_i}{\sum_i A_i} = 544 \text{ m}, \sum_i \frac{A_i}{\Delta_i} = 25386 \frac{\text{km}^2}{\text{m}}, n = \sum_i n_i = 4$$

## Basins:

|                      |        |        |        |        |        |       |       |
|----------------------|--------|--------|--------|--------|--------|-------|-------|
| $A_i[\text{km}^2]$   | 762112 | 494128 | 474328 | 333343 | 157546 | 80917 | 43252 |
| $\Delta_i[\text{m}]$ | 153    | 121    | 90     | 186    | 139    | 117   | 248   |
| $n_i$                | 0      | 1      | 0      | 0      | 0      | 0     | 0     |

$$A = \sum_i A_i = 2345625 \text{ km}^2, \Delta = \frac{\sum_i A_i \Delta_i}{\sum_i A_i} = 138 \text{ m}, \sum_i \frac{A_i}{\Delta_i} = 18136 \frac{\text{km}^2}{\text{m}}, n = \sum_i n_i = 1$$

### Igneous provinces:

|                      |        |       |       |       |
|----------------------|--------|-------|-------|-------|
| $A_i[\text{km}^2]$   | 479774 | 60473 | 23528 | 21985 |
| $\Delta_i[\text{m}]$ | 361    | 515   | 571   | 426   |
| $n_i$                | 0      | 0     | 0     | 0     |

$$A = \sum_i A_i = 585760 \text{ km}^2, \Delta = \frac{\sum_i A_i \Delta_i}{\sum_i A_i} = 388 \text{ m}, \sum_i \frac{A_i}{\Delta_i} = 1537 \frac{\text{km}^2}{\text{m}}, n = \sum_i n_i = 0$$

### Extended crust:

|                      |        |        |        |        |        |        |        |        |       |       |      |
|----------------------|--------|--------|--------|--------|--------|--------|--------|--------|-------|-------|------|
| $A_i[\text{km}^2]$   | 619507 | 554832 | 263996 | 241087 | 238003 | 200608 | 123307 | 109259 | 65274 | 64304 | 1669 |
| $\Delta_i[\text{m}]$ | 292    | 194    | 83     | 64     | 209    | 86     | 616    | 235    | 42    | 55    | 157  |
| $n_i$                | 0      | 0      | 0      | 0      | 0      | 0      | 0      | 0      | 0     | 0     | 0    |

$$A = \sum_i A_i = 2481846 \text{ km}^2, \Delta = \frac{\sum_i A_i \Delta_i}{\sum_i A_i} = 202 \text{ m}, \sum_i \frac{A_i}{\Delta_i} = 18801 \frac{\text{km}^2}{\text{m}}, n = \sum_i n_i = 0$$

### All (17) erosive provinces (shields, orogens, igneous):

$$A = \sum_i A_i = 19453125 \text{ km}^2, \Delta = \frac{\sum_i A_i \Delta_i}{\sum_i A_i} = 414 \text{ m}, \sum_i \frac{A_i}{\Delta_i} = 85130 \frac{\text{km}^2}{\text{m}}, n = \sum_i n_i = 33$$

## Temperate (C)

### Shields:

|                      |         |        |        |        |        |        |       |      |      |
|----------------------|---------|--------|--------|--------|--------|--------|-------|------|------|
| $A_i[\text{km}^2]$   | 2586477 | 520130 | 427611 | 381443 | 115510 | 113030 | 24314 | 3437 | 2277 |
| $\Delta_i[\text{m}]$ | 205     | 173    | 64     | 292    | 103    | 357    | 96    | 1001 | 347  |
| $n_i$                | 2       | 1      | 0      | 1      | 0      | 0      | 0     | 0    | 0    |

$$A = \sum_i A_i = 4174228 \text{ km}^2, \Delta = \frac{\sum_i A_i \Delta_i}{\sum_i A_i} = 196 \text{ m}, \sum_i \frac{A_i}{\Delta_i} = 25308 \frac{\text{km}^2}{\text{m}}, n = \sum_i n_i = 4$$

### Platforms:

|                      |        |        |        |        |       |       |       |      |      |      |
|----------------------|--------|--------|--------|--------|-------|-------|-------|------|------|------|
| $A_i[\text{km}^2]$   | 709933 | 211785 | 153368 | 140362 | 95828 | 43950 | 26992 | 9463 | 5149 | 1850 |
| $\Delta_i[\text{m}]$ | 24     | 24     | 87     | 104    | 44    | 43    | 432   | 159  | 539  | 8    |
| $n_i$                | 0      | 0      | 0      | 0      | 0     | 0     | 0     | 0    | 0    | 0    |

$$A = \sum_i A_i = 1398681 \text{ km}^2, \Delta = \frac{\sum_i A_i \Delta_i}{\sum_i A_i} = 52 \text{ m}, \sum_i \frac{A_i}{\Delta_i} = 44796 \frac{\text{km}^2}{\text{m}}, n = \sum_i n_i = 0$$

### Orogens:

|                      |         |        |        |        |       |      |
|----------------------|---------|--------|--------|--------|-------|------|
| $A_i[\text{km}^2]$   | 6774678 | 661870 | 370203 | 203769 | 50869 | 1785 |
| $\Delta_i[\text{m}]$ | 749     | 278    | 140    | 356    | 519   | 581  |
| $n_i$                | 1       | 0      | 1      | 0      | 0     | 0    |

$$A = \sum_i A_i = 8063174 \text{ km}^2, \Delta = \frac{\sum_i A_i \Delta_i}{\sum_i A_i} = 671 \text{ m}, \sum_i \frac{A_i}{\Delta_i} = 14742 \frac{\text{km}^2}{\text{m}}, n = \sum_i n_i = 2$$

### Basins:

|                      |        |        |        |        |       |       |       |       |       |       |       |
|----------------------|--------|--------|--------|--------|-------|-------|-------|-------|-------|-------|-------|
| $A_i[\text{km}^2]$   | 406971 | 369143 | 124201 | 114294 | 70426 | 66682 | 65777 | 58195 | 54799 | 32501 | 29028 |
| $\Delta_i[\text{m}]$ | 98     | 116    | 405    | 51     | 516   | 45    | 224   | 404   | 32    | 212   | 128   |
| $n_i$                | 3      | 0      | 0      | 0      | 0     | 0     | 0     | 0     | 0     | 0     | 0     |

$$A = \sum_i A_i = 1392017 \text{ km}^2, \Delta = \frac{\sum_i A_i \Delta_i}{\sum_i A_i} = 164 \text{ m}, \sum_i \frac{A_i}{\Delta_i} = 14039 \frac{\text{km}^2}{\text{m}}, n = \sum_i n_i = 3$$

### Igneous provinces:

|                      |        |        |       |       |      |
|----------------------|--------|--------|-------|-------|------|
| $A_i[\text{km}^2]$   | 312702 | 199111 | 45709 | 11000 | 5504 |
| $\Delta_i[\text{m}]$ | 201    | 646    | 483   | 458   | 99   |
| $n_i$                | 1      | 0      | 0     | 0     | 0    |

$$A = \sum_i A_i = 574025 \text{ km}^2, \Delta = \frac{\sum_i A_i \Delta_i}{\sum_i A_i} = 382 \text{ m}, \sum_i \frac{A_i}{\Delta_i} = 2037 \frac{\text{km}^2}{\text{m}}, n = \sum_i n_i = 1$$

### Extended crust:

|                      |         |         |        |        |        |       |       |       |       |       |       |       |       |       |      |
|----------------------|---------|---------|--------|--------|--------|-------|-------|-------|-------|-------|-------|-------|-------|-------|------|
| $A_i[\text{km}^2]$   | 1196050 | 1113638 | 553394 | 550342 | 306191 | 71198 | 58001 | 56227 | 44215 | 37629 | 31752 | 28540 | 25081 | 10296 | 6384 |
| $\Delta_i[\text{m}]$ | 225     | 352     | 130    | 48     | 216    | 344   | 147   | 154   | 199   | 711   | 434   | 778   | 507   | 76    | 78   |
| $n_i$                | 3       | 0       | 1      | 0      | 0      | 0     | 0     | 0     | 0     | 0     | 0     | 0     | 0     | 0     | 0    |

$$A = \sum_i A_i = 4088939 \text{ km}^2, \Delta = \frac{\sum_i A_i \Delta_i}{\sum_i A_i} = 233 \text{ m}, \sum_i \frac{A_i}{\Delta_i} = 27285 \frac{\text{km}^2}{\text{m}}, n = \sum_i n_i = 4$$

**All (20) erosive provinces (shields, orogens, igneous):**

$$A = \sum_i A_i = 12811428 \text{ km}^2, \Delta = \frac{\sum_i A_i \Delta_i}{\sum_i A_i} = 503 \text{ m}, \sum_i \frac{A_i}{\Delta_i} = 42087 \frac{\text{km}^2}{\text{m}}, n = \sum_i n_i = 7$$

**Arid (B)**

**Shields:**

|                      |         |         |         |        |        |        |        |        |        |       |       |
|----------------------|---------|---------|---------|--------|--------|--------|--------|--------|--------|-------|-------|
| $A_i[\text{km}^2]$   | 3788052 | 1539318 | 1335927 | 634547 | 542227 | 475628 | 437273 | 310520 | 176672 | 86236 | 23979 |
| $\Delta_i[\text{m}]$ | 136     | 64      | 57      | 125    | 48     | 39     | 91     | 182    | 733    | 80    | 201   |
| $n_i$                | 3       | 3       | 5       | 0      | 0      | 1      | 0      | 0      | 0      | 1     | 0     |

$$A = \sum_i A_i = 9350378 \text{ km}^2, \Delta = \frac{\sum_i A_i \Delta_i}{\sum_i A_i} = 112 \text{ m}, \sum_i \frac{A_i}{\Delta_i} = 112071 \frac{\text{km}^2}{\text{m}}, n = \sum_i n_i = 13$$

**Platforms:**

|                      |         |         |        |        |        |        |        |        |        |       |       |       |
|----------------------|---------|---------|--------|--------|--------|--------|--------|--------|--------|-------|-------|-------|
| $A_i[\text{km}^2]$   | 4933263 | 1617387 | 890667 | 553300 | 383587 | 294835 | 278511 | 111598 | 109183 | 80448 | 62067 | 36362 |
| $\Delta_i[\text{m}]$ | 65      | 45      | 152    | 32     | 260    | 24     | 28     | 283    | 20     | 72    | 136   | 11    |
| $n_i$                | 5       | 1       | 1      | 1      | 0      | 0      | 0      | 0      | 0      | 0     | 0     | 0     |

$$A = \sum_i A_i = 9351207 \text{ km}^2, \Delta = \frac{\sum_i A_i \Delta_i}{\sum_i A_i} = 76 \text{ m}, \sum_i \frac{A_i}{\Delta_i} = 169640 \frac{\text{km}^2}{\text{m}}, n = \sum_i n_i = 8$$



## Orogens:

|                      |          |        |        |        |       |       |
|----------------------|----------|--------|--------|--------|-------|-------|
| $A_i[\text{km}^2]$   | 10809777 | 580528 | 190654 | 109521 | 77788 | 43124 |
| $\Delta_i[\text{m}]$ | 467      | 62     | 72     | 51     | 261   | 73    |
| $n_i$                | 9        | 2      | 0      | 0      | 0     | 1     |

$$A = \sum_i A_i = 11811393 \text{ km}^2, \Delta = \frac{\sum_i A_i \Delta_i}{\sum_i A_i} = 434 \text{ m}, \sum_i \frac{A_i}{\Delta_i} = 38183 \frac{\text{km}^2}{\text{m}}, n = \sum_i n_i = 12$$

## Basins:

|                      |         |        |        |        |        |        |        |        |        |        |        |        |       |       |       |
|----------------------|---------|--------|--------|--------|--------|--------|--------|--------|--------|--------|--------|--------|-------|-------|-------|
| $A_i[\text{km}^2]$   | 2077936 | 769426 | 723610 | 640572 | 421541 | 381077 | 357014 | 325230 | 257373 | 205622 | 165232 | 129096 | 57817 | 25814 | 23739 |
| $\Delta_i[\text{m}]$ | 130     | 108    | 35     | 279    | 125    | 19     | 98     | 135    | 20     | 347    | 22     | 52     | 8     | 167   | 39    |
| $n_i$                | 0       | 0      | 1      | 0      | 0      | 0      | 0      | 0      | 0      | 1      | 0      | 0      | 0     | 0     | 0     |

$$A = \sum_i A_i = 6561097 \text{ km}^2, \Delta = \frac{\sum_i A_i \Delta_i}{\sum_i A_i} = 120 \text{ m}, \sum_i \frac{A_i}{\Delta_i} = 106678 \frac{\text{km}^2}{\text{m}}, n = \sum_i n_i = 2$$

## Igneous provinces:

|                      |        |        |        |       |       |
|----------------------|--------|--------|--------|-------|-------|
| $A_i[\text{km}^2]$   | 194452 | 121158 | 112883 | 27952 | 27099 |
| $\Delta_i[\text{m}]$ | 295    | 111    | 403    | 263   | 71    |
| $n_i$                | 0      | 0      | 0      | 0     | 0     |

$$A = \sum_i A_i = 483544 \text{ km}^2, \Delta = \frac{\sum_i A_i \Delta_i}{\sum_i A_i} = 260 \text{ m}, \sum_i \frac{A_i}{\Delta_i} = 2516 \frac{\text{km}^2}{\text{m}}, n = \sum_i n_i = 0$$

## Extended crust:

|                      |         |         |        |        |        |        |        |        |        |        |        |        |       |       |      |
|----------------------|---------|---------|--------|--------|--------|--------|--------|--------|--------|--------|--------|--------|-------|-------|------|
| $A_i[\text{km}^2]$   | 1561711 | 1041246 | 807314 | 700009 | 647355 | 486153 | 431792 | 397230 | 260429 | 219173 | 132742 | 106582 | 94154 | 31736 | 2366 |
| $\Delta_i[\text{m}]$ | 121     | 102     | 467    | 175    | 50     | 27     | 218    | 180    | 43     | 15     | 108    | 117    | 222   | 201   | 709  |
| $n_i$                | 1       | 0       | 0      | 0      | 1      | 0      | 0      | 0      | 0      | 0      | 0      | 0      | 0     | 0     | 0    |

$$A = \sum_i A_i = 6919991 \text{ km}^2, \Delta = \frac{\sum_i A_i \Delta_i}{\sum_i A_i} = 156 \text{ m}, \sum_i \frac{A_i}{\Delta_i} = 86851 \frac{\text{km}^2}{\text{m}}, n = \sum_i n_i = 2$$

## All (22) erosive provinces (shields, orogens, igneous):

$$A = \sum_i A_i = 21645315 \text{ km}^2, \Delta = \frac{\sum_i A_i \Delta_i}{\sum_i A_i} = 291 \text{ m}, \sum_i \frac{A_i}{\Delta_i} = 152770 \frac{\text{km}^2}{\text{m}}, n = \sum_i n_i = 25$$

## Tropical (A)

### Shields:

|                      |         |         |         |         |        |        |        |       |
|----------------------|---------|---------|---------|---------|--------|--------|--------|-------|
| $A_i[\text{km}^2]$   | 4383353 | 3761851 | 1845957 | 1786693 | 873448 | 474769 | 228818 | 44038 |
| $\Delta_i[\text{m}]$ | 195     | 134     | 168     | 111     | 178    | 72     | 400    | 244   |
| $n_i$                | 0       | 1       | 0       | 1       | 0      | 5      | 0      | 0     |

$$A = \sum_i A_i = 13398928 \text{ km}^2, \Delta = \frac{\sum_i A_i \Delta_i}{\sum_i A_i} = 161 \text{ m}, \sum_i \frac{A_i}{\Delta_i} = 90078 \frac{\text{km}^2}{\text{m}}, n = \sum_i n_i = 7$$

## Platforms:

|                      |         |        |        |       |       |       |       |       |      |
|----------------------|---------|--------|--------|-------|-------|-------|-------|-------|------|
| $A_i[\text{km}^2]$   | 1495837 | 588615 | 490663 | 65948 | 44440 | 26429 | 20654 | 16469 | 6735 |
| $\Delta_i[\text{m}]$ | 38      | 127    | 224    | 23    | 169   | 6     | 57    | 593   | 37   |
| $n_i$                | 0       | 3      | 0      | 0     | 0     | 0     | 0     | 0     | 0    |

$$A = \sum_i A_i = 2755790 \text{ km}^2, \Delta = \frac{\sum_i A_i \Delta_i}{\sum_i A_i} = 95 \text{ m}, \sum_i \frac{A_i}{\Delta_i} = 53908 \frac{\text{km}^2}{\text{m}}, n = \sum_i n_i = 3$$

## Orogens:

|                      |         |        |        |       |       |
|----------------------|---------|--------|--------|-------|-------|
| $A_i[\text{km}^2]$   | 3857139 | 540508 | 140797 | 56493 | 51152 |
| $\Delta_i[\text{m}]$ | 623     | 361    | 378    | 323   | 95    |
| $n_i$                | 0       | 0      | 0      | 0     | 0     |

$$A = \sum_i A_i = 4646090 \text{ km}^2, \Delta = \frac{\sum_i A_i \Delta_i}{\sum_i A_i} = 576 \text{ m}, \sum_i \frac{A_i}{\Delta_i} = 8775 \frac{\text{km}^2}{\text{m}}, n = \sum_i n_i = 0$$

## Basins:

|                      |         |        |        |        |        |       |       |
|----------------------|---------|--------|--------|--------|--------|-------|-------|
| $A_i[\text{km}^2]$   | 1195958 | 616395 | 154093 | 111619 | 110965 | 19220 | 13242 |
| $\Delta_i[\text{m}]$ | 84      | 81     | 36     | 166    | 31     | 67    | 10    |
| $n_i$                | 0       | 0      | 0      | 0      | 0      | 0     | 0     |

$$A = \sum_i A_i = 2221492 \text{ km}^2, \Delta = \frac{\sum_i A_i \Delta_i}{\sum_i A_i} = 81 \text{ m}, \sum_i \frac{A_i}{\Delta_i} = 32015 \frac{\text{km}^2}{\text{m}}, n = \sum_i n_i = 0$$

### Igneous provinces:

|                      |        |        |       |      |
|----------------------|--------|--------|-------|------|
| $A_i[\text{km}^2]$   | 243922 | 144341 | 10245 | 1612 |
| $\Delta_i[\text{m}]$ | 133    | 575    | 434   | 183  |
| $n_i$                | 1      | 0      | 0     | 0    |

$$A = \sum_i A_i = 400120 \text{ km}^2, \Delta = \frac{\sum_i A_i \Delta_i}{\sum_i A_i} = 301 \text{ m}, \sum_i \frac{A_i}{\Delta_i} = 2112 \frac{\text{km}^2}{\text{m}}, n = \sum_i n_i = 1$$

### Extended crust:

|                      |         |         |        |        |        |        |        |        |       |       |       |       |       |       |       |      |
|----------------------|---------|---------|--------|--------|--------|--------|--------|--------|-------|-------|-------|-------|-------|-------|-------|------|
| $A_i[\text{km}^2]$   | 1242514 | 1120258 | 451676 | 436582 | 382713 | 295849 | 135475 | 111192 | 90716 | 83181 | 69014 | 39246 | 27501 | 21749 | 12927 | 4457 |
| $\Delta_i[\text{m}]$ | 73      | 361     | 128    | 236    | 69     | 12     | 85     | 147    | 75    | 671   | 104   | 41    | 479   | 674   | 76    | 103  |
| $n_i$                | 0       | 0       | 0      | 0      | 0      | 0      | 2      | 0      | 0     | 0     | 0     | 0     | 0     | 0     | 0     | 0    |

$$A = \sum_i A_i = 4525050 \text{ km}^2, \Delta = \frac{\sum_i A_i \Delta_i}{\sum_i A_i} = 180 \text{ m}, \sum_i \frac{A_i}{\Delta_i} = 61782 \frac{\text{km}^2}{\text{m}}, n = \sum_i n_i = 2$$

### All (17) erosive provinces (shields, orogens, igneous):

$$A = \sum_i A_i = 18445137 \text{ km}^2, \Delta = \frac{\sum_i A_i \Delta_i}{\sum_i A_i} = 268 \text{ m}, \sum_i \frac{A_i}{\Delta_i} = 100966 \frac{\text{km}^2}{\text{m}}, n = \sum_i n_i = 8$$
