# Supplementary material for: Long-term erosion rates as a function of climate derived from the impact crater inventory
Source: Copernicus journal article supplement (doi:10.5194/esurf-7-459-2019), 2019-05-23
Supplement: Supplementary file 2 [file esurf-7-459-2019-supplement.zip]

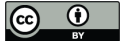

## *Supplement of*

# **Long-term erosion rates as a function of climate derived from the impact crater inventory**

**Stefan Hergarten and Thomas Kenkmann**

*Correspondence to:* Stefan Hergarten ([stefan.hergarten@geologie.uni-freiburg.de](mailto:stefan.hergarten@geologie.uni-freiburg.de))

- [esurf-7-459-2019-supplement-title-page.pdf](#)
- [climate.png](#)
- [data.pdf](#)
- [erosionrate.png](#)
- [geology.png](#)
- [readme.txt](#)
- [relief.png](#)

The copyright of individual parts of the supplement might differ from the CC BY 4.0 License.
